# Supplementary material for: Deferasirox-Dependent Iron Chelation Enhances Mitochondrial Dysfunction and Restores p53 Signaling by Stabilization of p53 Family Members in Leukemic Cells
Source: MDPI journal article supplement (doi:10.3390/ijms21207674), 2020-10-16
Supplement: s1 [file s1]

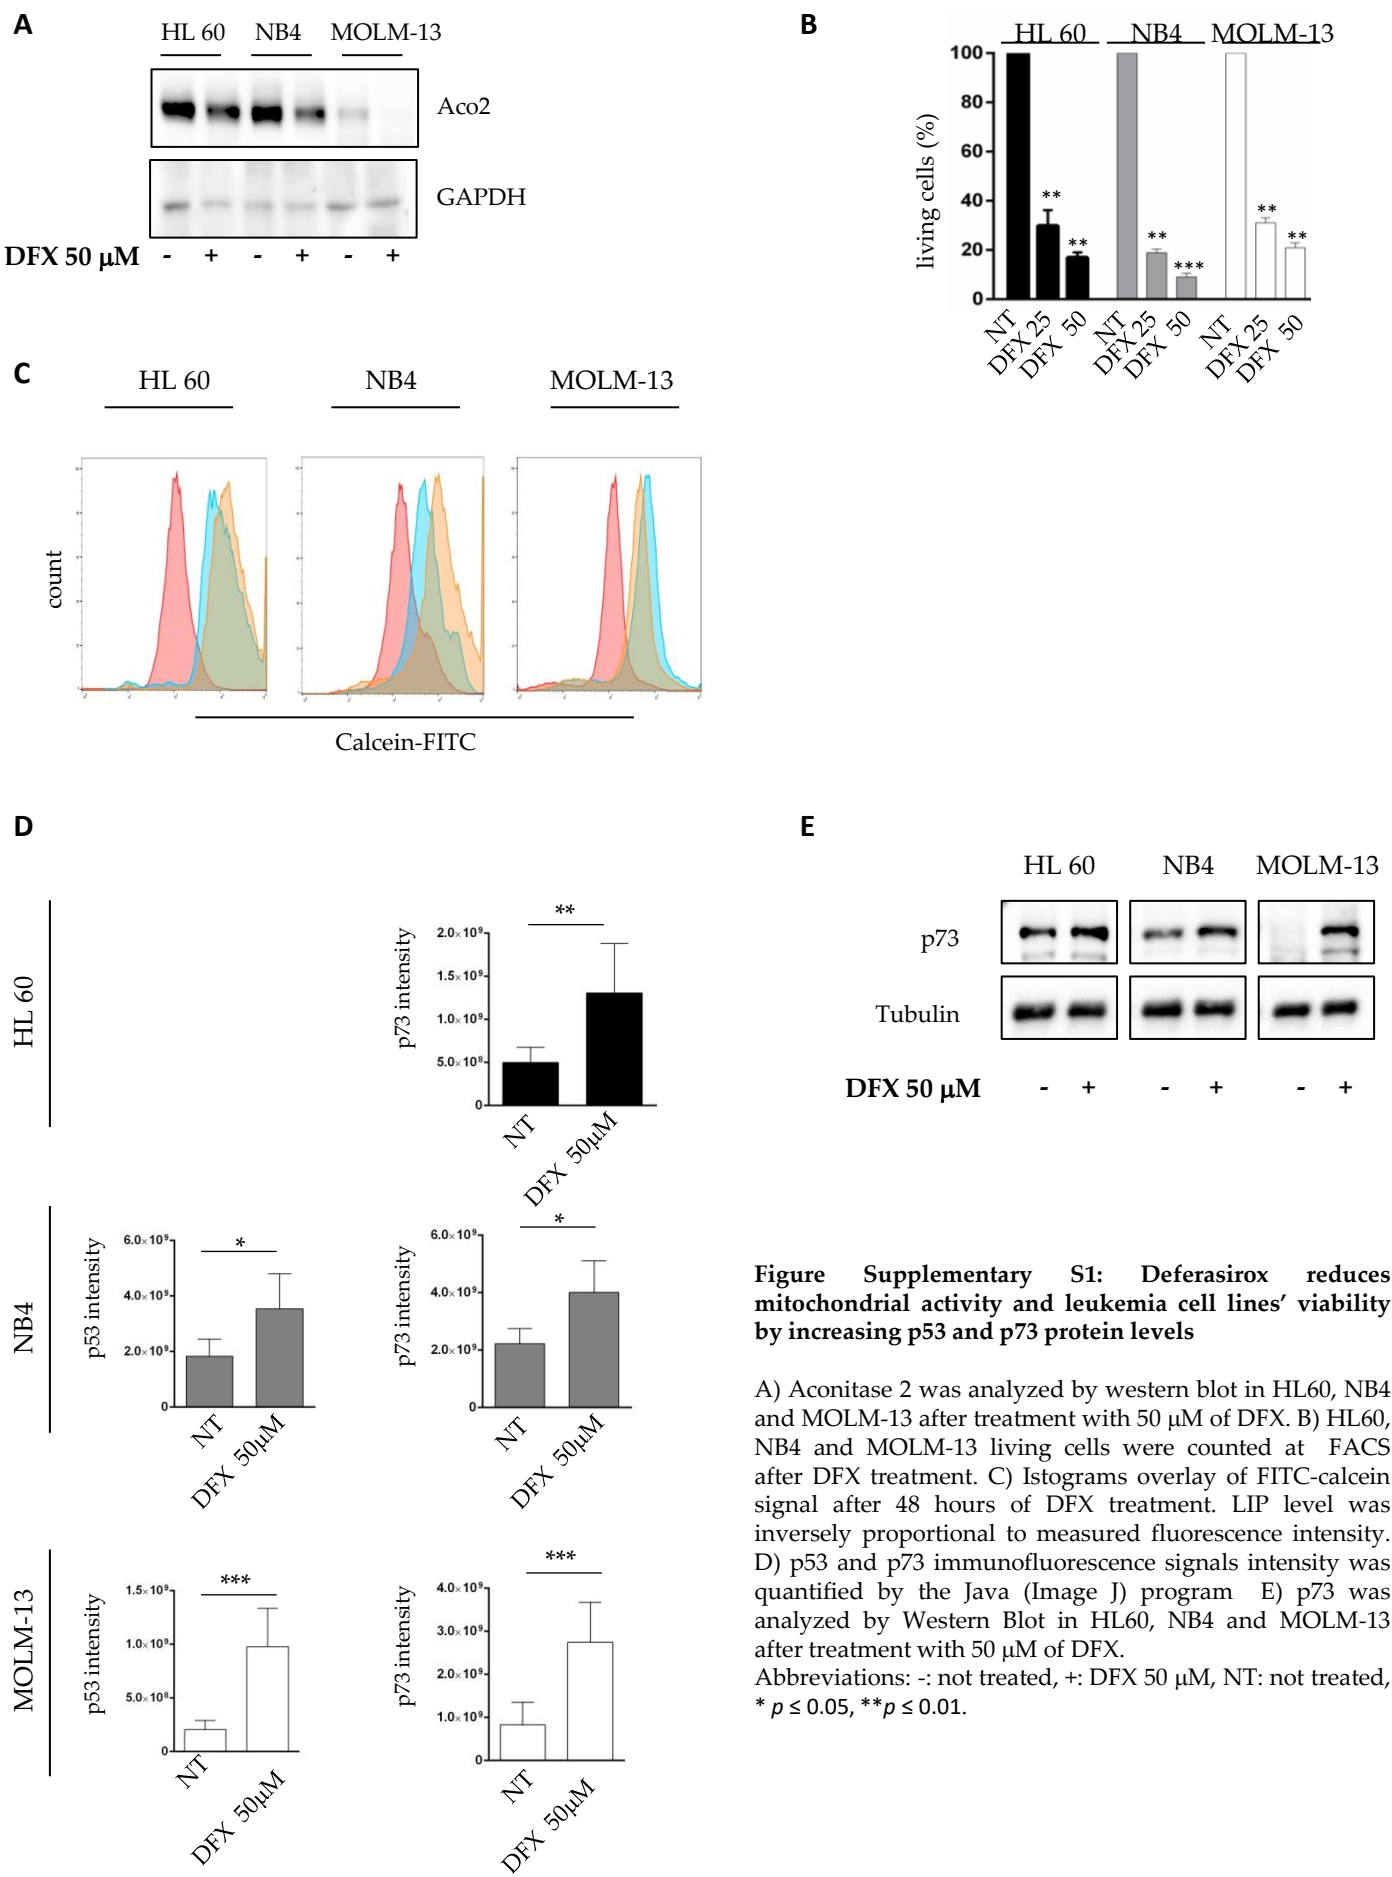

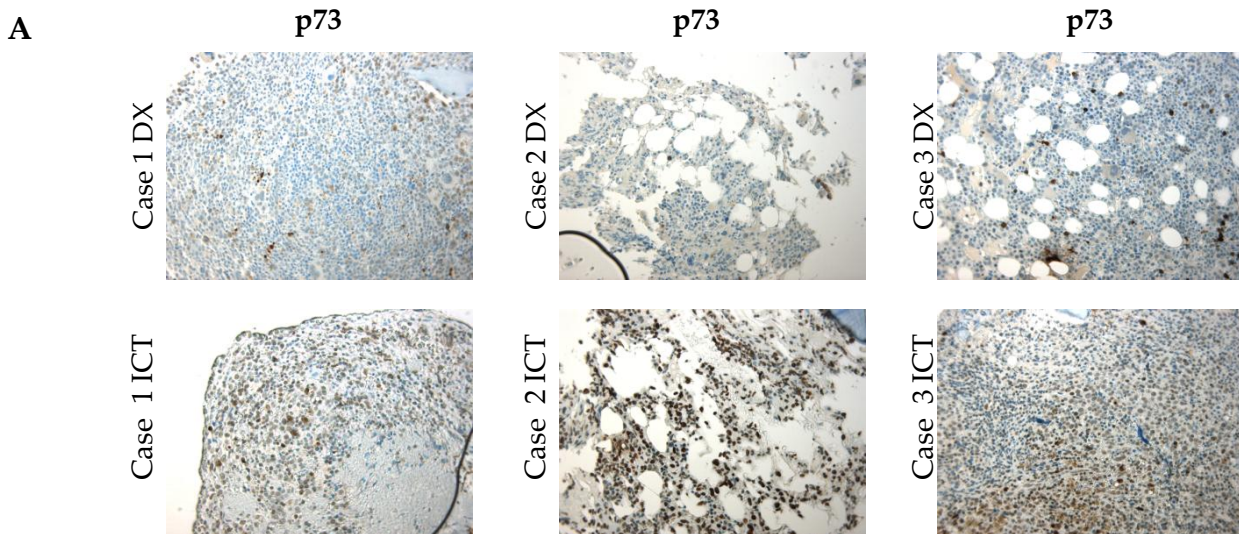

**B**

| Cases  | Samples      | SCORE p73 |
|--------|--------------|-----------|
| Case 1 | Sample 1-DX  | 40%       |
|        | Sample 1-DFX | 70%       |
| Case 2 | Sample 2-DX  | <1%       |
|        | Sample 2-DFX | 90%       |
| Case 3 | Sample 3-DX  | 10%       |
|        | Sample 3-DFX | 20%       |
| Case 4 | Sample 4-DX  | <1%       |
|        | Sample 4-DFX | 10%       |
| Case 5 | Sample 5-DX  | 90%       |
|        | Sample 5-DFX | 90%       |

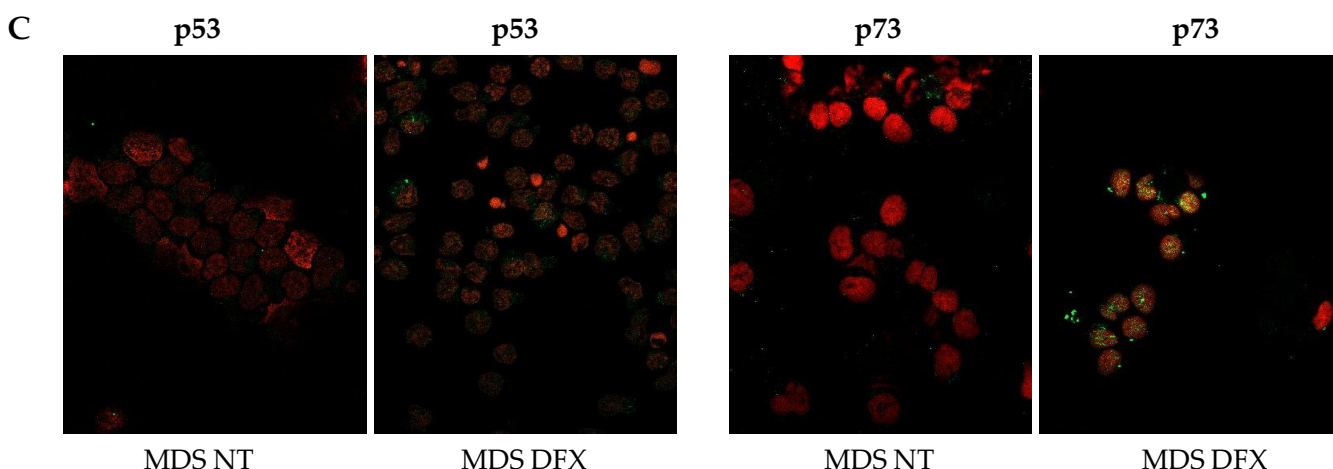

**Figure Supplementary S2: Iron chelation treatment induces a significant p73 increase in MDS patients' cells.**  
 A) p73 Immunohistochemistry on MDS bone marrow samples derived from 3 different patients at diagnosis (DX) and within one year of iron chelation treatment (ICT) (10x magnification). B) Table illustrating MDS samples used for IHC analysis and p73 scores. Slides were scored independently by 2 pathologists. C) Immunofluorescence of p53 and p73 in one MDS sample after DFX treatment. The green signal corresponds to p53 or p73 while the red propidium is used to detect nuclei (63x magnification).  
 Abbreviations: DX: diagnosis, ICT: iron chelation treatment.
